# Supplementary material for: Bi5O7I/g-C3N4 Heterostructures With Enhanced Visible-Light Photocatalytic Performance for Degradation of Tetracycline Hydrochloride
Source: Front Chem. 2021 Dec 14;9:781991. doi: 10.3389/fchem.2021.781991 (PMC8712322; doi:10.3389/fchem.2021.781991)
Supplement: Supplementary file 10 [file Table1.XLSX]

## Sheet: Figure6a
Time/min	g-c3n4	0.06	0.08	0.1	0.08	BIOI	BI5O7I	g-c3n4	0.06	0.08	0.1	0.08	BIOI	BI5O7I
0	0.457	0.447	0.439	0.454	0.445	0.456	0.461	1	1	1	1	1	1	1
15	0.42	0.356	0.337	0.361	0.32	0.445	0.415	0.919037	0.796421	0.767654	0.795154	0.719101	0.975877	0.900217
30	0.391	0.301	0.28	0.314	0.246	0.436	0.371	0.85558	0.673378	0.637813	0.69163	0.552809	0.95614	0.804772
45	0.362	0.266	0.24	0.276	0.204	0.428	0.335	0.792123	0.595078	0.546697	0.60793	0.458427	0.938596	0.726681
60	0.338	0.229	0.204	0.24	0.167	0.421	0.302	0.739606	0.512304	0.464692	0.528634	0.375281	0.923246	0.655098
75	0.319	0.196	0.17	0.207	0.138	0.415	0.275	0.698031	0.438479	0.387244	0.455947	0.310112	0.910088	0.596529
90	0.302	0.173	0.142	0.18	0.11	0.41	0.25	0.660832	0.387025	0.323462	0.396476	0.247191	0.899123	0.542299
105	0.287	0.154	0.117	0.152	0.092	0.406	0.231	0.628009	0.344519	0.266515	0.334802	0.206742	0.890351	0.501085
120	0.275	0.138	0.098	0.131	0.073	0.401	0.216	0.601751	0.308725	0.223235	0.288546	0.164045	0.879386	0.468547
135	0.265	0.127	0.08	0.111	0.058	0.397	0.202	0.579869	0.284116	0.182232	0.244493	0.130337	0.870614	0.438178
150	0.256	0.112	0.065	0.097	0.046	0.394	0.189	0.560175	0.250559	0.148064	0.213656	0.103371	0.864035	0.409978
165	0.248	0.099	0.052	0.085	0.035	0.393	0.179	0.54267	0.221477	0.118451	0.187225	0.0786517	0.861842	0.388286
180	0.241	0.087	0.039	0.075	0.027	0.392	0.171	0.527352	0.194631	0.0888383	0.165198	0.0606742	0.859649	0.370933

## Sheet: Figure6b
Time/min	g-c3n4	0.06	0.08	0.1	0.08	BIOI	BI5O7I
0	0	0	0	0	0	0	0
15	0.0844287	0.227628	0.264416	0.229219	0.329753	0.0244185	0.10512
30	0.155976	0.395448	0.44971	0.368704	0.592743	0.0448506	0.217196
45	0.233039	0.519062	0.60386	0.497696	0.779954	0.0633696	0.319268
60	0.301637	0.668837	0.766379	0.637458	0.98008	0.07986	0.422971
75	0.359492	0.824444	0.948701	0.785378	1.17082	0.0942143	0.516627
90	0.414256	0.949267	1.12867	0.92514	1.39759	0.106336	0.611937
105	0.465201	1.06561	1.32233	1.09422	1.57629	0.11614	0.69098
120	0.507912	1.1753	1.49953	1.2429	1.80761	0.128531	0.75812
135	0.544954	1.25837	1.70247	1.40857	2.03763	0.138557	0.82513
150	0.579506	1.38406	1.91011	1.54339	2.26943	0.146142	0.891651
165	0.611255	1.50744	2.13326	1.67545	2.54273	0.148683	0.946012
180	0.639886	1.63665	2.42094	1.80061	2.80224	0.151231	0.991734

## Sheet: Figure6c
Time/min	1st	2nd	3rd	4th	5th
0	1
30	0.55281
60	0.37528
90	0.24719
120	0.16404
150	0.10337
180	0.06067	1
210		0.56
240		0.38
270		0.25
300		0.17
330		0.11
360		0.07	1
390			0.565
420			0.39
450			0.26
480			0.175
510			0.115
540			0.075	1
570				0.57
600				0.395
630				0.265
660				0.18
690				0.12
720				0.078	1
750					0.575
780					0.4
810					0.27
840					0.185
870					0.125
900					0.082

## Sheet: Figure6d
Scavenger	C/C0
NO	0.0606
BQ	0.182
IPA	0.203
EDTA	0.921
